# Supplementary material for: Higher Prevalence of Nonsense Pathogenic DMD Variants in a Single-Center Cohort from Brazil: A Genetic Profile Study That May Guide the Choice of Disease-Modifying Treatments
Source: MDPI journal article supplement (doi:10.3390/brainsci13111521), 2023-10-28
Supplement: s1 [file s1]

**Supplementary Table S1.** Profile of point Mutations in Northeast brazilians.

| <b>Mutation</b> | <b>Patients</b> | <b>Nucleotide change</b>     | <b>Protein change</b>  | <b>Phenotype</b> |
|-----------------|-----------------|------------------------------|------------------------|------------------|
| Nonsense        | 4               | c.8038 C>T                   | p.Arg2680*             | DMD              |
| Nonsense        | 3               | c.453 T>G                    | p.Try151*              | DMD              |
| Nonsense        | 2               | c.433 C>T                    | p.Arg145*              | DMD              |
| Nonsense        | 2               | c.6283 C>T                   | p.Arg2095*             | DMD              |
| Splice-site     | 2               | c.3603+A>T                   |                        | DMD              |
| Splice-site     | 2               | c.3603+3A>T                  |                        | BMD/DMD          |
| Nonsense        | 1               | c.3151C>T                    | p.Arg1051*             | DMD              |
| Frameshift      | 1               | c.4314_4315delAA<br>CTT >    | p.Arg1439Serfs*6       | DMD              |
| Nonsense        | 1               | c.6292 C>T                   | p.Arg2098*             | DMD              |
| Nonsense        | 1               | c.8608C>T                    | p.Arg2870*             | DMD              |
| Nonsense        | 1               | c.8945 G > A                 | p.Arg2982*             | DMD              |
| Nonsense        | 1               | c.9337C>T                    | p.Arg3113*             | DMD              |
| Frameshift      | 1               | c.141dupG                    | p.Arg48Glu fs*41       | DMD              |
| Frameshift      | 1               | c.2552_2553insA<br>G>GT      | p.Asn851Lys fs*17      | DMD              |
| Nonsense        | 1               | c.10011C>A                   | p.Cys3337*             | DMD              |
| Frameshift      | 1               | c.3295_3296delCA<br>CTG>C    | p.Gln1099Asp<br>fs*11  | DMD              |
| Frameshift      | 1               | c.5131delC TG > T            | p.Gln1711Ser fs*1<br>0 | DMD              |
| Nonsense        | 1               | c.Gln3037C>T                 | p.Gln3037*             | DMD              |
| Nonsense        | 1               | c.133C>T                     | p.Gln45*               | DMD              |
| Frameshift      | 1               | c.3533_3536delAAGA           | p.Glu1178Gly fs*2<br>2 | DMD              |
| Frameshift      | 1               | c.9269_9270delAG<br>GCT>G    | p.Glu3090Ala fs*       | DMD              |
| Frameshift      | 1               |                              | p.Glu701Arg<br>fs*28   | DMD              |
| Frameshift      | 1               | c.3185_3192delinsTTT<br>GTAT | p.Lys1062Ile fs*10     | DMD              |
| Frameshift      | 1               | c.3396delA                   | p.Lys1132Asn fs*2<br>0 | DMD              |
| Frameshift      | 1               | c.6974delA -<br>CCDS5S395.1  | p.Lys2325Ser fs*       | DMD              |
| Nonsense        | 1               | c.8744 G>A                   | p.Trp2915*             | DMD              |
| Nonsense        | 1               | c.9248G>A                    | p.Trp3083*             | DMD              |
| Nonsense        | 1               | c.5646 C>A                   | p.Tyr1882*             | DMD              |
| Nonsense        | 1               | c.6276C>A                    | p.Tyr2092*             | DMD              |
| Splice-site     | 1               | c.5740-1G>T                  |                        | BMD              |
| Splice-site     | 1               | c.9362-1G>C                  |                        | DMD              |
| Splice-site     | 1               | c.2804-1del                  |                        | DMD              |
| Splice-site     | 1               | c.2169-1G>A                  |                        | DMD              |
| Splice-site     | 1               | c.9286+2delT                 |                        | DMD              |
